# Supplementary material for: Exosomes from Bone Marrow Microenvironment-Derived Mesenchymal Stem Cells Affect CML Cells Growth and Promote Drug Resistance to Tyrosine Kinase Inhibitors
Source: Hindawi journal article supplement (doi:10.1155/2020/8890201), 2020-12-13
Supplement: f1 [file 8890201.f1.pdf]

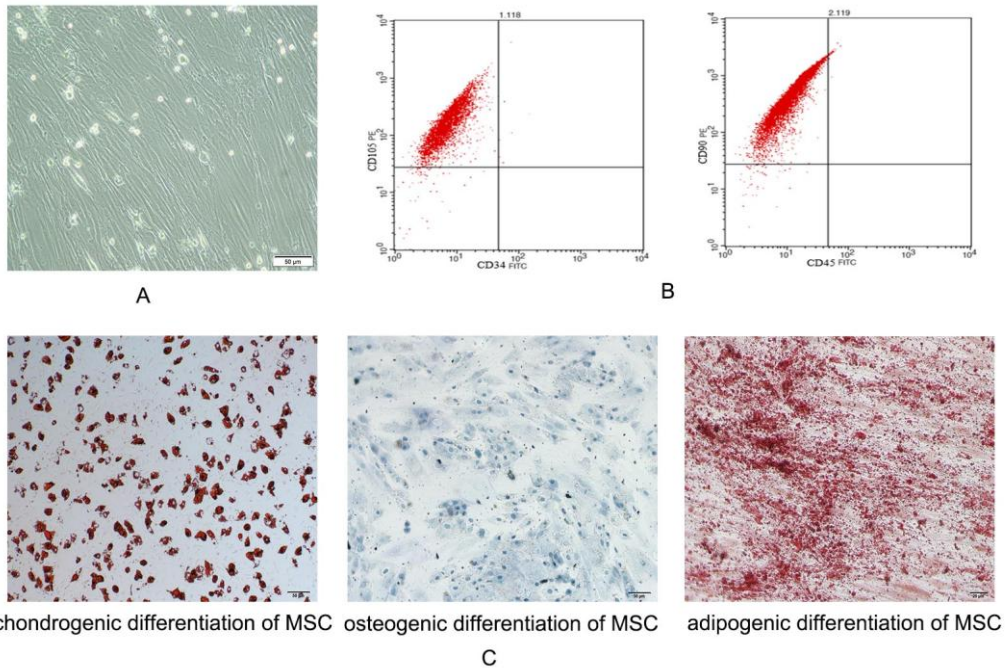

**Supplementary Figure 1. identification of hBMMSC.**

(A) Representative morphology of confluent MSC layers from bone marrow. (B) The immunophenotype of primary MSC. (C) The multilineage differentiation ability of MSC (chondrogenic, osteogenic, and adipogenic differentiation).

**Supplementary Figure 2. Particle size distribution in purified hBMMSC-Exo.**

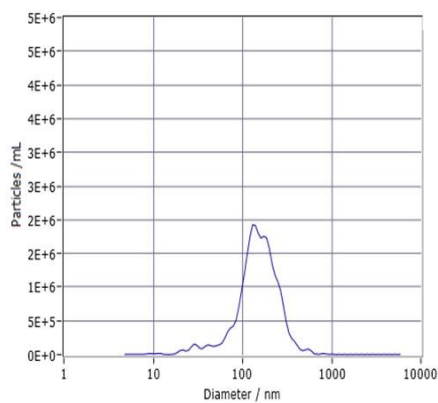

**Peak Analysis (Concentration)**

| Diameter / nm | Particles/mL | FWHM / nm | Percentage |
|---------------|--------------|-----------|------------|
| 142.4         | 1.9E+6       | 166.8     | 96.5       |
| 29.1          | 1.5E+5       | 10.2      | 2.9        |
| 11.3          | 1.5E+4       | 4.2       | 0.3        |
| 800.3         | 1.4E+4       | 114.7     | 0.1        |
| 1208.8        | 3.2E+3       | 163.4     | 0.0        |
